# Supplementary material for: Effects of Genic Base Composition on Growth Rate in G+C-rich Genomes
Source: PubMed Central journal article supplement (PMC4478552; doi:10.1534/g3.115.016824), 2015-04-20
Supplement: supp_g3.115.016824_016824SI.pdf [file supp_g3.115.016824_016824SI.pdf]

**Effects of Genic Base Composition on Growth Rate in G+C-rich Genomes**

Yogeshwar D. Kelkar<sup>†1</sup>, Daniel S. Phillips<sup>†</sup>, Howard Ochman<sup>†2</sup>

<sup>†</sup>Department of Ecology and Evolutionary Biology, Yale University, New Haven, CT 06520

<sup>1</sup>Current address: Department of Biostatistics and Computational Biology, University of

Rochester School of Medicine and Dentistry, Rochester, New York, USA;

<sup>2</sup>Current address: Department of Integrative Biology, University of Texas, Austin, Texas, USA

**Corresponding author:**

Howard Ochman

University of Texas

2506 Speedway, NMS 4.216

Austin, TX 78712

**Email:** [howard.ochman@austin.utexas.edu](mailto:howard.ochman@austin.utexas.edu)

**Phone:** 512-232-5666

DOI: 10.1534/g3.115.016824

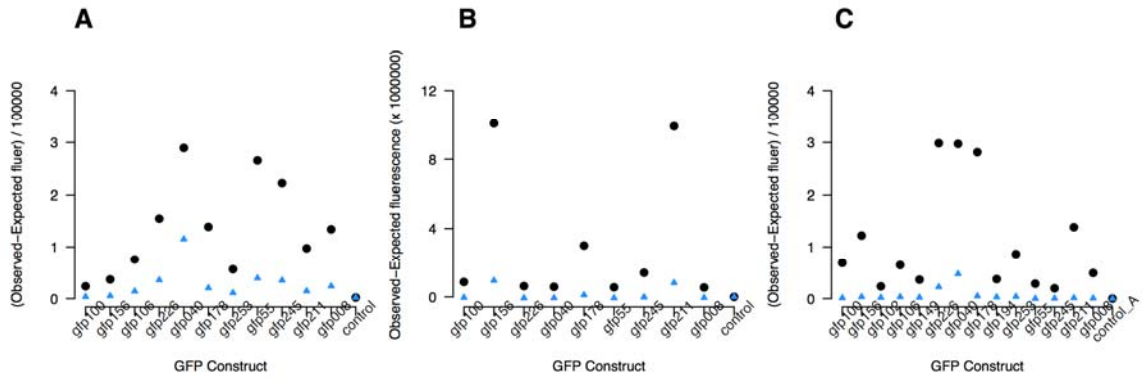

**Figure S1** Difference in normalized fluorescence between induced (black circles) and non-induced (blue triangles) cultures of: **(A)** *Caulobacter crescentus*, **(B)** *Pseudomonas aeruginosa*, and **(C)** *Escherichia coli*. Non-induced strains of *C. crescentus* produce greater fluorescence in relation to non-induced strains of *E. coli* and *P. aeruginosa*. Values for *E. coli* were obtained from R. Raghavan, Kelkar YD, Ochman H. 2012. Proc. Natl. Acad. Sci. USA **109**:14504–14507.

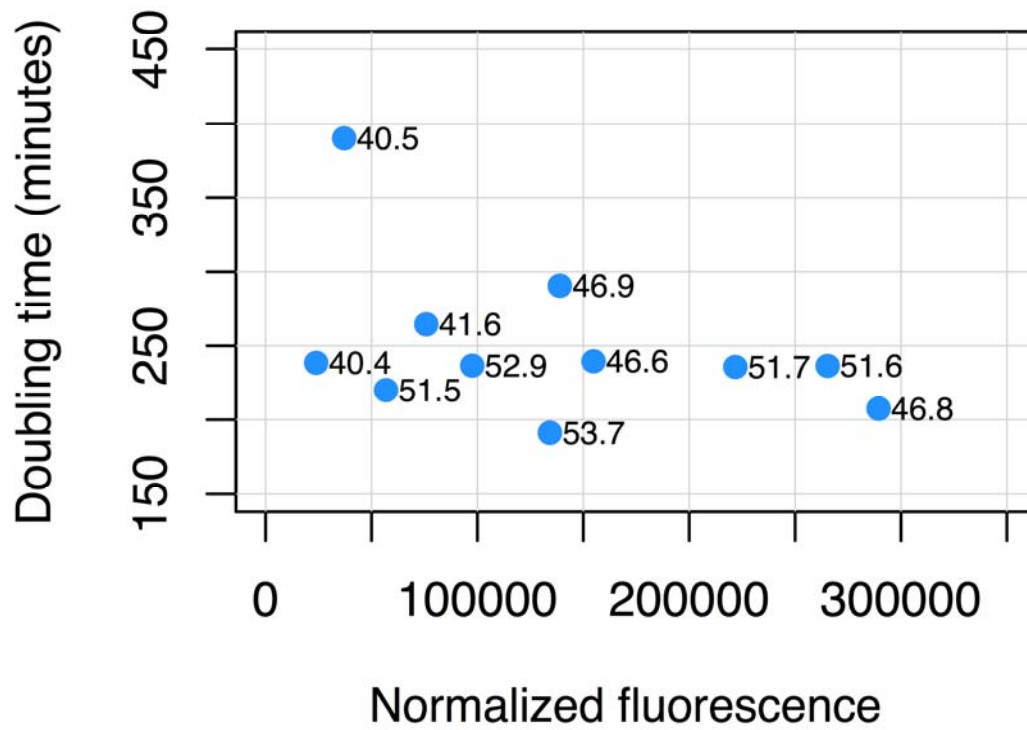

**Figure S2** Relationship between GFP production and doubling time in *C. crescentus* strains expressing GFP gene-variants of different base composition at synonymous sites. (Normalized fluorescence of bacterial cultures used as a proxy for GFP expression.) Numbers next to plotted points denote the base composition (G+C%) of the corresponding GFP variant.

**Table S1 Primer sequences and their applications**

---

| To amplify<br>GFP gene for<br>insertion into: | Primer Name         | Sequence (5' ... 3')                     |
|-----------------------------------------------|---------------------|------------------------------------------|
| pNW33N                                        | Bpu10I-gfp1         | CGACTGGATCCGCTTAGGAGATATAACCATGGTCAG     |
|                                               | Bpu10I-gfp2         | CGACTGGATCCGCTTAGGAGATATAACCATGGTTAG     |
|                                               | Bpu10I-gfp3         | CGACTGGATCCGCTTAGGAGATATAACCATGGTGAG     |
|                                               | Bpu10I-gfp6         | CGACTGGATCCGCTTAGGAGATATAACCATGGTAAG     |
|                                               | BstZ17I-<br>common2 | CCTTTCAGCAGTATACCCCTCAAGACCCGTTTAG       |
| pBXMCS-2                                      | Apa1_pet15_F        | CAATTCAGTCGACTGGGGCCCAGGAGAGATATAACCATGG |
|                                               | EcoR1_pet15_R       | CTCCTTTCAGCGAATTCCCCCTCAAGACCCGTTTAG     |

---

**Tables S2-S3**

Available for download as Excel files at [www.g3journal.org/lookup/suppl/doi:10.1534/g3.115.016824/-/DC1](http://www.g3journal.org/lookup/suppl/doi:10.1534/g3.115.016824/-/DC1)

**Table S2** Fluorescence and absorbance readings of induced and uninduced cultures of *Caulobacter crescentus*.

**Table S3** Fluorescence and absorbance readings of induced and uninduced cultures of *Pseudomonas aeruginosa*.
