# Supplementary material for: Effects of Genic Base Composition on Growth Rate in G+C-rich Genomes
Source: PubMed Central journal article supplement (PMC4478552; doi:10.1534/g3.115.016824), 2015-04-20
Supplement: supp_g3.115.016824_FigureS1.pdf [file supp_g3.115.016824_FigureS1.pdf]

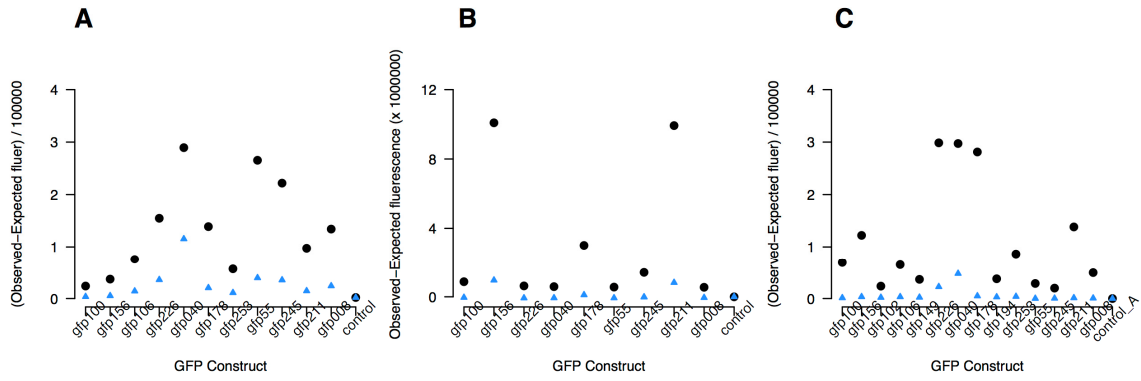

**Figure S1** Difference in normalized fluorescence between induced (black circles) and non-induced (blue triangles) cultures of: **(A)** *Caulobacter crescentus*, **(B)** *Pseudomonas aeruginosa*, and **(C)** *Escherichia coli*. Non-induced strains of *C. crescentus* produce greater fluorescence in relation to non-induced strains of *E. coli* and *P. aeruginosa*. Values for *E. coli* were obtained from R. Raghavan, Kelkar YD, Ochman H. 2012. Proc. Natl. Acad. Sci. USA **109**:14504–14507.
