# Supplementary material for: Effects of Genic Base Composition on Growth Rate in G+C-rich Genomes
Source: PubMed Central journal article supplement (PMC4478552; doi:10.1534/g3.115.016824), 2015-04-20
Supplement: supp_g3.115.016824_TableS1.pdf [file supp_g3.115.016824_TableS1.pdf]

**Table S1 Primer sequences and their applications**

---

| To amplify<br>GFP gene for<br>insertion into: | Primer Name         | Sequence (5' ... 3')                     |
|-----------------------------------------------|---------------------|------------------------------------------|
| pNW33N                                        | Bpu10I-gfp1         | CGACTGGATCCGCTTAGGAGATATAACCATGGTCAG     |
|                                               | Bpu10I-gfp2         | CGACTGGATCCGCTTAGGAGATATAACCATGGTTAG     |
|                                               | Bpu10I-gfp3         | CGACTGGATCCGCTTAGGAGATATAACCATGGTGAG     |
|                                               | Bpu10I-gfp6         | CGACTGGATCCGCTTAGGAGATATAACCATGGTAAG     |
|                                               | BstZ17I-<br>common2 | CCTTTCAGCAGTATACCCCTCAAGACCCGTTTAG       |
| pBXMCS-2                                      | Apa1_pet15_F        | CAATTCAGTCGACTGGGGCCCAGGAGAGATATAACCATGG |
|                                               | EcoR1_pet15_R       | CTCCTTTCAGCGAATTCCCCCTCAAGACCCGTTTAG     |

---
